# Supplementary material for: An arms race between 5’ppp-RNA virus and its alternative recognition receptor MDA5 in RIG-I-lost teleost fish
Source: eLife journal article supplement (doi:10.7554/elife.94898), 2024-01-24
Supplement: fig1-data1 [file elife-94898-fig1-data1-v1.zip]

## Sheet: Sheet1
		Fig1E
		SCRV-RNA			SCRV-RNA-CIAP
	2	1.645	1.913	1.798	1.261	1.201	1.134
	10	4.13	4.961	5.779	2.346	2.943	3.017
	50	11.936	13.164	12.791	4.461	3.942	4.908
			Fig1H
			Vector	MDA5	MDA5+LGP2
			1.013	2.314	3.451
			1.152	2.227	3.679
			0.967	2.469	3.271
						Fig1I
		Vector			MDA5			MDA5+si-LGP2
	LGP2	1.001	1.069	0.923	0.886	0.927	1.004	0.312	0.456	0.407
	IFN-1	1.007	1.125	0.885	2.015	2.147	2.223	1.677	1.532	1.499
