# Supplementary material for: An arms race between 5’ppp-RNA virus and its alternative recognition receptor MDA5 in RIG-I-lost teleost fish
Source: eLife journal article supplement (doi:10.7554/elife.94898), 2024-01-24
Supplement: fig2-data1 [file elife-94898-fig2-data1-v1.zip]

## Sheet: Sheet1
Fig2A				Fig2D
si-Ctrl	si-MDA5-1	si-MDA5-2			si-Ctrl			si-MDA5-1			si-MDA5-2
1.063	0.312	0.456		NF-κB	1.012	0.942	1.047	0.504	0.439	0.523	0.765	0.612	0.657
1.13	0.356	0.531		IRF3	1.087	0.937	1.086	0.369	0.466	0.398	0.51	0.413	0.442
0.904	0.371	0.483		IRF7	1.124	0.917	1.01	0.379	0.401	0.342	0.53	0.413	0.462
				IFN-1	1.104	0.947	0.988	0.479	0.401	0.412	0.534	0.613	0.492
Fig2E								Fig2G
	si-Ctrl			si-MDA5					Vector			MDA5
IFN-1	0.989	1.131	0.935	0.321	0.467	0.352		IFN-1	1.004	1.139	0.906	1.923	1.866	2.152
	14.028	16.432	17.813	10.397	9.541	8.289			14.121	13.432	15.813	24.397	21.541	22.289
	18.641	20.31	21.751	15.45	16.17	14.87			18.641	19.31	21.151	25.45	26.17	28.87
Mx1	1.003	0.845	1.205	0.543	0.567	0.468		MX1	0.988	0.876	1.233	1.708	1.642	1.853
	964.103	1031.71	934.287	761.461	723.177	733.579			706.001	756.561	736.472	891.11	871.841	844.237
	1520.72	1383.18	1496.36	1088.22	983.532	1001.51			1079.78	1011.01	1071.85	1301.32	1275.12	1379.32
ISG15	1.004	0.876	1.233	0.508	0.642	0.553		ISG15	1.008	0.894	1.132	3.508	3.642	3.253
	806.546	756.851	736.792	531.781	471.812	444.076			706.561	726.147	746.653	1131.13	1171	1044.84
	1079.01	1112.01	1071.55	701.324	875.1	776.321			1079.07	1102.01	1031.55	1401.32	1505.17	1476.32
Viperin	1.009	0.876	1.221	0.528	0.642	0.553		Viperin	1.017	0.864	1.197	3.528	3.642	4.553
	1875.02	1956.81	1836.45	1431.12	1471.42	1545.14			1765.14	1866.17	1878.47	2436.1	2574.4	2542.14
	2079.08	2112.01	2171.55	1701.32	1675.17	1676.33			1978.45	2024.05	2167.35	2756.43	2675.12	2676.38
Fig2F
	Vector			MDA5
MDA5	1.001	1.139	0.905	21.921	22.867	23.852
	8.12	7.432	8.813	38.397	36.541	41.289
	6.641	5.31	6.151	35.45	37.17	33.87
Fig2I									Fig2K
		si-Ctrl			si-MDA5					Vector			MDA5
SCRV-M	12	1.003	0.918	1.129	1.512	1.786	1.635		SCRV-M	1.001	0.939	1.121	0.507	0.716	0.608
	24	1.931	1.717	2.032	2.904	2.874	2.748			1.831	1.787	1.692	0.854	1.083	1.117
	48	1.462	1.321	1.632	1.991	2.184	2.337			1.264	1.117	1.332	0.731	0.884	0.944
		si-Ctrl			si-MDA5					Vector			MDA5
SCRV-G	12	0.998	0.877	1.032	1.734	1.976	2.136		SCRV-G	0.999	0.917	1.132	0.452	0.316	0.407
	24	1.735	1.618	1.929	3.234	3.484	3.623			1.831	1.726	1.575	0.804	0.884	0.708
	48	1.462	1.311	1.554	2.451	1.982	2.138			1.284	1.102	1.233	0.601	0.504	0.636
	Fig2N				Fig2O
	Vector	MDA5	MDA5+STING			Vector			MDA5			MDA5+si-STING
IFN-1	1.013	2.034	2.615		STING	1.007	0.953	1.042	1.236	1.104	0.956	0.436	0.398	0.491
	0.967	1.975	3.127		IFN-1	1.002	0.967	1.037	2.034	1.975	2.138	1.215	1.127	1.099
	1.037	2.138	2.899
		Fig2Q
		Mock	SCRV-RNA	SCRV-RNA+si-MDA5
	IFN-1	1.011	11.571	4.312
		1.136	11.798	3.589
		0.899	10.079	5.224
