# Supplementary material for: An arms race between 5’ppp-RNA virus and its alternative recognition receptor MDA5 in RIG-I-lost teleost fish
Source: eLife journal article supplement (doi:10.7554/elife.94898), 2024-01-24
Supplement: fig3-data1 [file elife-94898-fig3-data1-v1.zip]

## Sheet: Sheet1
	Fig3A
		Vector-Flag			MDA5-Flag
	SCRV-M	0.179	0.198	0.098	1.298	0.971	1.694
	SCRV-G	0.085	0.194	0.123	1.361	1.927	1.279
	β-actin	0.116	0.209	0.136	0.122	0.203	0.124
	Fig3C
		IgG			Flag			IgG			Flag
	SCRV-M	0.129	0.167	0.092	1.297	0.971	1.493	0.149	0.159	0.098	0.198	0.091	0.093
	SCRV-G	0.085	0.164	0.123	1.366	1.853	1.174	0.085	0.194	0.123	0.226	0.173	0.094
	Fig3E
		Vector			MDA5			MDA5-△RD
	SCRV-M	1.025	1.234	0.857	0.433	0.563	0.346	1.12	0.912	0.801
	SCRV-G	1.223	1.146	0.855	0.317	0.345	0.451	0.817	0.941	1.021
	Fig3F-IFN-1
		Vector			MDA5			MDA5-△RD
	Mock	0.998	1.108	0.907	1.846	1.859	2.171	1.986	2.017	2.248
	SCRV	15.246	13.791	12.947	24.942	22.678	25.211	15.198	18.679	16.223
	poly(I:C)-HMW	17.641	18.564	19.554	26.848	26.264	28.775	18.655	19.305	17.902
	Fig3G-Mx1
		Vector			MDA5			MDA5-△RD
	Mock	1.021	0.895	1.166	1.802	1.698	1.833	1.587	1.698	1.809
	SCRV	688.03	765.128	712.854	962.154	903.454	883.912	693.008	735.349	745.641
	poly(I:C)-HMW	968.167	1008.68	1061.27	1327.05	1296.22	1368.55	1027.7	1032.56	1089.26
	Fig3H-ISG15
		Vector			MDA5			MDA5-△RD
	Mock	1.002	0.913	1.157	3.408	3.685	3.177	3.366	3.881	3.645
	SCRV	756.379	782.015	803.766	1244.09	1256.3	1194.33	806.197	795.564	812.452
	poly(I:C)-HMW	998.446	1068.23	1029.84	1433.68	1533.97	1486.31	986.304	1126.94	1105.99
	Fig3I-Viperin
		Vector			MDA5			MDA5-△RD
	Mock	0.997	0.11	0.926	3.784	3.016	4.424	3.279	4.313	4.601
	SCRV	1631.79	1768.46	1801.73	2413.24	2692.65	2534.13	1856.12	1805.76	1713.18
	poly(I:C)-HMW	1878.01	2016.9	2108.56	2861.48	2696.19	2732.29	1994.34	2083.79	2146.69
