# Supplementary material for: An arms race between 5’ppp-RNA virus and its alternative recognition receptor MDA5 in RIG-I-lost teleost fish
Source: eLife journal article supplement (doi:10.7554/elife.94898), 2024-01-24
Supplement: fig5-data1 [file elife-94898-fig5-data1-v1.zip]

## Sheet: Sheet1
			Fig5E
				anti-IgG			anti-m6A
			MDA5-m6A-1	1.013	0.856	1.164	13.123	10.641	11.947
			MDA5-m6A-2	1.074	0.92	1.131	8.121	7.742	8.851
		Fig5F
			Mock			SCRV			poly(I:C)
		MDA5-m6A-1	1.092	0.856	1.144	2.536	2.371	2.213	2.021	1.893	2.264
		MDA5-m6A-2	1.07	0.921	1.131	1.945	1.871	1.746	1.445	1.641	1.761
			Fig5G
			DMSO			CL
		Mock	0.998	0.872	1.106	1.356	1.304	1.492
		SCRV	0.446	0.483	0.417	1.297	1.388	1.434
			Fig5H
			spleen			kidney
		0h	1.031	0.925	1.123	0.987	0.933	1.132
		3h	6.902	7.311	7.561	16.902	17.321	15.561
		6h	7.542	8.522	8.942	10.542	11.522	9.942
		12h	6.124	6.581	7.014	4.124	4.581	4.014
		24h	3.124	3.561	3.945	3.924	3.561	3.945
		48h	1.845	2.103	1.674	3.445	3.103	3.074
		Fig5I
			0h	6h	12h	24h	36h	48h
		SCRV	1.002	2.482	8.865	6.09	4.012	2.108
			1.021	2.685	9.145	6.712	4.986	1.296
			0.921	2.532	8.073	6.523	3.901	1.993
		Fig5J
			0h	6h	12h	24h	36h	48h
		poly(I:C)	1.001	3.483	7.867	3.28	2.012	1.114
			1.021	3.885	6.945	3.012	2.987	1.291
			0.921	3.932	7.674	2.524	3.101	1.983
