# Supplementary material for: An arms race between 5’ppp-RNA virus and its alternative recognition receptor MDA5 in RIG-I-lost teleost fish
Source: eLife journal article supplement (doi:10.7554/elife.94898), 2024-01-24
Supplement: fig6-data1 [file elife-94898-fig6-data1-v1.zip]

## Sheet: Sheet1
	Fig6A
		si-Ctrl			si-RNA1			si-RNA2			si-RNA3
	METTL3	1.013	0.941	1.102	0.493	0.452	0.417	0.351	0.412	0.451	0.756	0.822	0.718
	METTL14	1.011	0.92	1.083	0.791	0.858	0.736	0.551	0.612	0.456	0.355	0.419	0.321
		Fig6C-Left panel				Fig6C-Right panel
		si-Ctrl	si-METTL3	si-METTL14		Vector	METTL3	METTL14
		1.009	0.457	0.494		1.002	1.552	2.092
		0.919	0.549	0.365		0.921	1.747	1.869
		1.104	0.484	0.486		1.106	1.683	1.782
		Fig6E
		Vector			METTL3			METTL14
		1.001	0.917	1.132	1.662	1.784	1.635	1.664	1.504	1.637
		1.16	1.003	0.942	1.896	1.933	1.701	1.616	1.883	1.795
			Fig6F-Left panel
			si-Ctrl			si-METTL3			si-METTL14
		MDA5-m6A-1	1.131	1.001	0.902	0.496	0.406	0.528	0.456	0.415	0.578
		MDA5-m6A-2	0.856	0.998	1.136	0.646	0.539	0.721	0.637	0.576	0.526
			Fig6F-Right panel
			Vector			METTL3			METTL14
		MDA5-m6A-1	1.126	0.999	0.91	1.694	1.505	1.728	1.616	1.896	1.579
		MDA5-m6A-2	0.869	1.001	1.134	1.437	1.533	1.629	1.436	1.576	1.624
		Fig6G				Fig6H				Fig6J
		si-Ctrl	si-METTL3	si-METTL14		Vector	METTL3	METTL14		Vector	METTL3&14	METTL3&14+CL
		1.112	1.892	2.207		1.109	0.452	0.407		1.011	0.431	1.003
		1.021	2.021	2.232		1.022	0.401	0.342		0.971	0.389	0.94
		0.913	1.94	1.921		0.933	0.44	0.421		1.132	0.328	0.872
		Fig6L								Fig6M
			Vector			METTL3&14				Vector	MDA5	MDA5+METTL3&14
		MDA5-m6A-1	1.012	0.944	1.05	0.501	0.456	0.403		1.012	28.91	20.361
		MDA5-m6A-2	5.072	5.946	4.789	3.051	3.274	2.601		0.941	26.314	21.391
										1.127	31.841	23.842
		Fig6O
			Vector			MDA5			MDA5+METTL3&14
		SCRV-M	1.001	0.917	1.132	0.524	0.424	0.571	0.891	0.741	0.657
		SCRV-G	1.16	1.003	0.942	0.506	0.433	0.341	0.696	0.543	0.595
