# Supplementary material for: An arms race between 5’ppp-RNA virus and its alternative recognition receptor MDA5 in RIG-I-lost teleost fish
Source: eLife journal article supplement (doi:10.7554/elife.94898), 2024-01-24
Supplement: fig6-figsupp1-data1 [file elife-94898-fig6-figsupp1-data1-v1.zip]

## Sheet: Sheet1
	Figure 6-figure supplement 1A
	si-Ctrl	si-METTL3	si-METTL14
	1.11	1.892	2.007
	1.02	1.721	1.932
	0.913	1.94	1.821
	Figure 6-figure supplement 1C
		si-Ctrl			si-METTL3&14
	MDA5-exon1-wt	1.011	0.866	1.134	1.959	2.215	1.814
	MDA5-exon1-mut	1.279	1.302	1.397	1.437	1.324	1.249
	Figure 6-figure supplement 1D
	Vector	METTL3	METTL14
	0.499	0.216	0.207
	0.412	0.179	0.139
	0.436	0.204	0.158
