# Supplementary material for: An arms race between 5’ppp-RNA virus and its alternative recognition receptor MDA5 in RIG-I-lost teleost fish
Source: eLife journal article supplement (doi:10.7554/elife.94898), 2024-01-24
Supplement: fig7-data1 [file elife-94898-fig7-data1-v1.zip]

## Sheet: Fig.7
		Fig7A
		Vector-Flag	YTHDF1-Flag	YTHDF2-Flag	YTHDF3-Flag
		1.027	4.231	13.68	12.314
		1.133	5.304	16.622	11.45
		0.856	3.168	14.646	13.712
	Fig7B
		si-Ctrl			siRNA1			siRNA2
	YTHDF1	1.101	0.933	1.04	0.41	0.326	0.358	0.65	0.721	0.622
	YTHDF2	1.031	0.957	1.046	0.769	0.714	0.691	0.543	0.476	0.52
	YTHDF3	1.033	0.952	1.071	0.555	0.604	0.523	0.387	0.461	0.501
		Fig7C					Fig7D
		si-Ctrl	si-YTHDF1	si-YTHDF2	si-YTHDF3		Vector	YTHDF1	YTHDF2	YTHDF3
		1.11	1.297	2.652	2.043		1.119	1.097	0.322	0.507
		1.04	1.127	2.321	1.982		1.021	0.857	0.422	0.452
		0.923	1.21	2.439	2.321		0.913	0.901	0.44	0.421
		Fig7E					Fig7G
		Vector	YTHDF2&3	YTHDF2&3+si-METTL3&14			Vector	FTO	ALKBH5
		1.021	0.464	1.113			1.012	1.534	0.971
		0.937	0.374	1.041			1.134	1.642	1.123
		1.146	0.359	1.272			0.956	1.497	1.234
		Fig7H
		Vector	YTHDF2&3	YTHDF2&3+FTO
		1.012	0.461	1.013
		0.974	0.389	0.941
		1.131	0.357	0.872
