# Supplementary material for: An arms race between 5’ppp-RNA virus and its alternative recognition receptor MDA5 in RIG-I-lost teleost fish
Source: eLife journal article supplement (doi:10.7554/elife.94898), 2024-01-24
Supplement: fig7-figsupp1-data1 [file elife-94898-fig7-figsupp1-data1-v1.zip]

## Sheet: Sheet1
	Figure 7-figure supplement 1A
	si-Ctrl	si-YTHDF1	si-YTHDF2	si-YTHDF3
	1.11	1.098	2.052	1.809
	1.031	0.926	2.327	1.902
	0.927	1.21	2.441	2.321
	Figure 7-figure supplement 1B
		si-Ctrl			si-YTHDF2&3
	MDA5-exon1-wt	1.012	0.956	1.12	1.964	2.015	2.21
	MDA5-exon1-mut	1.219	1.317	1.413	1.464	1.321	1.208
	Figure 7-figure supplement 1C
	Vector	YTHDF1	YTHDF2	YTHDF3
	0.489	0.416	0.207	0.292
	0.409	0.479	0.239	0.244
	0.428	0.504	0.258	0.308
